# Supplementary material for: Genoprotective Properties and Metabolites of β-Glucan-Rich Edible Mushrooms Following Their In Vitro Fermentation by Human Faecal Microbiota
Source: PubMed Central journal article supplement (PMC7435999; doi:10.3390/molecules25153554), 2020-08-04
Supplement: molecules-25-03554-s001.pdf [file molecules-25-03554-s001.pdf]

**Table S1.** Biological efficiency, productivity, and total,  $\alpha$ - and  $\beta$ -glucans content of *Pleurotus ostreatus*, *P. eryngii*, *P. nebrodensis*, *P. citrinopileatus*, *Hericium erinaceus* and *Cyclocybe cylindracea* strains (WS: wheat straw; TPOMW: two-phase olive-mill waste; OLPR: olive leaves and prunings; GM: grape marc; OL: olive leaves). Strains appearing in bold typeface were selected for further study.

| Species/Strain                            | Substrate    | Biological Efficiency (%) | Productivity | Total glucans (% d.w.) | $\alpha$ -glucans (% d.w.) | $\beta$ -glucans (% d.w.) |
|-------------------------------------------|--------------|---------------------------|--------------|------------------------|----------------------------|---------------------------|
| <i>P. ostreatus</i> 1123 <sup>1</sup>     | WS           | 77.3 ± 5.52               | 1.0 ± 0.2    | 39.4 ± 1.3             | 8.7 ± 0.4                  | 30.6 ± 2.5                |
|                                           | WS:TPOMW 3:1 | 73.7 ± 1.1                | 1.0 ± 0.1    | 37.5 ± 0.6             | 6.0 ± 1.1                  | 31.5 ± 0.4                |
|                                           | WS:TPOMW 1:1 | 71.3 ± 12.3               | 0.8 ± 0.1    | 31.7 ± 2.2             | 2.2 ± 0.6                  | 29.6 ± 2.4                |
|                                           | WS:TPOMW 1:3 | 17.4 ± 8.2                | 0.2 ± 0.1    | 32.7 ± 1.4             | 4.7 ± 0.8                  | 28.1 ± 1.5                |
|                                           | WS:OLPR 3:1  | 82.6 ± 14.5               | 1.1 ± 0.2    | 35.3 ± 1.9             | 7.2 ± 2.0                  | 28.0 ± 1.6                |
|                                           | WS:OLPR 1:1  | 56.8 ± 6.2                | 0.7 ± 0.1    | 35.2 ± 3.4             | 6.3 ± 2.1                  | 28.9 ± 3.5                |
|                                           | WS:OLPR 1:3  | 39.7 ± 1.4                | 0.5 ± 0.1    | 36.8 ± 1.7             | 5.7 ± 2.4                  | 25.6 ± 0.2                |
|                                           | OLPR         | 44.7 ± 11.7               | 0.5 ± 0.2    | 38.5 ± 2.9             | 3.4 ± 0.6                  | 35.1 ± 2.8                |
| <i>P. ostreatus</i> LGM 22 <sup>2</sup>   | WS           | 100.5 ± 15.0              | 3.1 ± 0.7    | 34.3 ± 2.1             | 6.6 ± 1.1                  | 27.7 ± 2.4                |
|                                           | WS:GM 3:1    | 62.8 ± 3.2                | 1.9 ± 0.2    | 37.6 ± 4.7             | 4.0 ± 0.9                  | 33.5 ± 4.4                |
|                                           | WS:GM 1:1    | 29.7 ± 8.0                | 0.9 ± 0.3    | 36.1 ± 2.4             | 6.7 ± 0.7                  | 29.4 ± 2.5                |
|                                           | WS:GM 1:3    | 24.8 ± 5.6                | 0.6 ± 0.2    | 31.6 ± 0.7             | 5.1 ± 1.2                  | 26.5 ± 0.6                |
|                                           | OL           | 29.3 ± 8.4                | 0.7 ± 0.3    | 35.5 ± 1.0             | 3.4 ± 0.7                  | 32.1 ± 1.1                |
|                                           | OL:TPOMW 3:1 | 46.2 ± 13.7               | 0.7 ± 0.2    | 39.9 ± 0.5             | 4.9 ± 1.0                  | 35.0 ± 0.4                |
|                                           | OL:TPOMW 1:1 | 55.4 ± 3.0                | 0.9 ± 0.0    | 34.3 ± 1.3             | 6.0 ± 0.8                  | 28.3 ± 1.2                |
|                                           | OL:TPOMW 1:3 | 26.6 ± 13.0               | 0.6 ± 0.2    | 27.7 ± 3.9             | 3.5 ± 0.7                  | 24.1 ± 3.6                |
| <i>P. ostreatus</i> 104                   | WS           | 106.7 ± 7.8               | 1.6 ± 0.3    | 35.9 ± 1.1             | 6.2 ± 1.6                  | 29.7 ± 1.0                |
|                                           | WS:GM 1:1    | 98.0 ± 19.6               | 1.8 ± 0.3    | 32.8 ± 3.5             | 5.6 ± 1.0                  | 27.2 ± 3.4                |
|                                           | OL:TPOMW 1:1 | 27.0 ± 0.1                | 0.4 ± 0.1    | 24.4 ± 2.3             | 6.8 ± 0.5                  | 17.6 ± 2.4                |
| <i>P. ostreatus</i> CS                    | WS           | 79.7 ± 33.1               | 0.8 ± 0.2    | 29.4 ± 2.1             | 10.6 ± 2.0                 | 18.8 ± 2.1                |
|                                           | WS:GM 1:1    | 84.1 ± 22.5               | 1.9 ± 0.2    | 26.4 ± 0.7             | 6.8 ± 1.0                  | 19.6 ± 0.6                |
|                                           | OL:TPOMW 1:1 | 17.9 ± 5.6                | 0.3 ± 0.2    | 28.8 ± 1.4             | 7.9 ± 3.0                  | 20.9 ± 1.2                |
| <i>P. ostreatus</i> 3046                  | WS           | 109.4 ± 17.9              | 3.7 ± 0.6    | 25.2 ± 2.1             | 2.2 ± 0.3                  | 22.9 ± 1.7                |
| <i>P. ostreatus</i> P80                   | WS           | 69.8 ± 28.0               | 2.4 ± 0.9    | 19.5 ± 1.7             | 1.7 ± 0.1                  | 17.8 ± 1.5                |
| <i>P. ostreatus</i> P15 <sup>3</sup>      | WS           | 87.6 ± 8.4                | 2.9 ± 0.3    | 24.0 ± 4.2             | 2.3 ± 0.4                  | 21.7 ± 1.8                |
| <i>P. ostreatus</i> P57 <sup>3</sup>      | WS           | 90.6 ± 24.6               | 3.4 ± 1.0    | 19.4 ± 0.8             | 4.1 ± 0.5                  | 15.3 ± 1.0                |
| <i>P. ostreatus</i> P59 <sup>3</sup>      | WS           | 65.0 ± 12.1               | 2.4 ± 0.7    | 15.0 ± 0.5             | 4.0 ± 0.3                  | 10.9 ± 0.0                |
| <i>P. ostreatus</i> P69 <sup>3</sup>      | WS           | 79.2 ± 16.2               | 2.0 ± 1.0    | 19.1 ± 0.7             | 3.8 ± 1.9                  | 15.3 ± 0.5                |
| <i>P. ostreatus</i> P112 <sup>3</sup>     | WS           | 97.2 ± 19.7               | 3.2 ± 1.1    | 14.5 ± 1.0             | 2.9 ± 0.2                  | 11.5 ± 0.8                |
| <i>P. ostreatus</i> P146 <sup>3</sup>     | WS           | 87.1 ± 18.0               | 4.2 ± 1.5    | 15.7 ± 0.3             | 4.1 ± 1.0                  | 11.6 ± 0.3                |
| <i>P. ostreatus</i> P149 <sup>3</sup>     | WS           | 87.0 ± 23.4               | 3.3 ± 1.2    | 19.2 ± 0.1             | 5.0 ± 0.8                  | 14.2 ± 0.1                |
| <i>P. ostreatus</i> P179 <sup>3</sup>     | WS           | 81.8 ± 21.1               | 4.3 ± 1.7    | 17.3 ± 0.1             | 4.5 ± 0.7                  | 12.7 ± 0.7                |
| <i>P. ostreatus</i> P182 <sup>3</sup>     | WS           | 85.1 ± 15.7               | 3.2 ± 0.6    | 21.5 ± 0.3             | 4.8 ± 1.1                  | 16.7 ± 0.2                |
| <i>P. ostreatus</i> LGAM 443 <sup>3</sup> | WS           | 43.9 ± 9.3                | 1.5 ± 0.4    | 22.1 ± 0.8             | 5.2 ± 0.6                  | 16.9 ± 0.4                |
| <i>P. eryngii</i> LGAM 216 <sup>2</sup>   | WS           | 57.3 ± 9.6                | 0.8 ± 0.1    | 46.6 ± 4.9             | 7.9 ± 3.3                  | 38.7 ± 5.4                |

|                                          |              |              |           |            |            |             |
|------------------------------------------|--------------|--------------|-----------|------------|------------|-------------|
|                                          | WS:GM 1:1    | 87.2 ± 8.9   | 1.4 ± 0.2 | 49.7 ± 1.3 | 7.6 ± 2.4  | 42.2 ± 1.3  |
|                                          | OL:TPOMW 1:1 | 73.3 ± 8.8   | 1.1 ± 0.1 | 40.2 ± 1.9 | 7.4 ± 1.5  | 32.8 ± 2.3  |
| <i>P. eryngii</i> LGAM 170               | WS           | 38.4 ± 3.1   | 0.4 ± 0.0 | 24.3 ± 1.2 | 4.5 ± 1.0  | 19.8 ± 1.3  |
|                                          | WS:GM 1:1    | 48.2 ± 14.7  | 0.6 ± 0.0 | 28.0 ± 0.5 | 2.7 ± 0.1  | 25.3 ± 0.7  |
|                                          | OL:TPOMW 1:1 | 42.3 ± 14.8  | 0.6 ± 0.2 | 27.1 ± 0.9 | 2.7 ± 0.5  | 24.4 ± 3.2  |
| <i>P. nebrodensis</i> UPA 6 <sup>2</sup> | WS           | 35.9 ± 13.8  | 1.5 ± 0.4 | 28.6 ± 2.4 | 8.0 ± 1.3  | 20.6 ± 2.6  |
|                                          | WS:GM 3:1    | 28.3 ± 13.9  | 0.8 ± 0.4 | 35.5 ± 3.1 | 8.6 ± 1.4  | 27.0 ± 2.8  |
|                                          | WS:GM 1:1    | 36.8 ± 30.3  | 1.1 ± 0.4 | 32.6 ± 2.3 | 7.8 ± 1.5  | 24.8 ± 2.3  |
|                                          | WS:GM 1:3    | 37.6 ± 1.8   | 0.8 ± 0.2 | 37.7 ± 3.9 | 9.4 ± 1.8  | 28.3 ± 4.1  |
|                                          | OL           | 34.6 ± 4.6   | 0.2 ± 0.0 | 30.8 ± 1.0 | 8.0 ± 2.1  | 22.8 ± 0.8  |
|                                          | OL:TPOMW 3:1 | 11.9 ± 0.3   | 1.1 ± 0.3 | 29.6 ± 3.8 | 6.9 ± 2.0  | 22.6 ± 4.0  |
|                                          | OL:TPOMW 1:1 | 18.4 ± 12.0  | 1.1 ± 0.1 | 35.7 ± 3.9 | 10.8 ± 2.4 | 24.9 ± 4.2  |
| <i>P. citrinopileatus</i>                | WS           | 53.7 ± 16.5  | 0.8 ± 0.3 | 30.3 ± 1.2 | 8.3 ± 2.5  | 22.0 ± 1.1  |
|                                          | WS:GM 1:1    | 78.5 ± 1.7   | 1.5 ± 0.1 | 28.4 ± 1.1 | 5.7 ± 1.2  | 22.7 ± 1.2  |
|                                          | OL:TPOMW 1:1 | 26.2 ± 3.6   | 0.5 ± 0.1 | 27.2 ± 0.4 | 6.7 ± 2.4  | 20.5 ± 0.1  |
| <i>H. erinaceus</i> <sup>4</sup>         | BS           | 6.0 ± 0.2    | 0.1 ± 0.0 | 16.4 ± 0.1 | 1.0 ± 0.1  | 15.4 ± 0.2  |
|                                          | BS:OLPR 3:1  | 6.4 ± 0.1    | 0.1 ± 0.0 | 16.8 ± 0.7 | 0.9 ± 0.1  | 15.8 ± 0.6  |
|                                          | BS:OLPR 1:3  | 24.3 ± 0.5   | 0.3 ± 0.0 | 16.6 ± 0.1 | 0.9 ± 0.1  | 15.7 ± 0.1  |
|                                          | OLPR         | 30.8 ± 2.7   | 0.3 ± 0.0 | 21.8 ± 0.2 | 1.1 ± 0.1  | 20.7 ± 0.3  |
| <i>C. cylindracea</i> CC2                | WS           | 109.7 ± 14.4 | 1.2 ± 0.1 | 39.3 ± 2.1 | 6.1 ± 0.5  | 33.2 ± 1.9  |
|                                          | WS:OLPR 1:3  | 69.8 ± 6.9   | 0.7 ± 0.0 | 35.0 ± 5.4 | 8.6 ± 1.1  | 26.3 ± 4.8  |
| <i>C. cylindracea</i> CC3                | WS           | 118.3 ± 19.9 | 1.3 ± 0.3 | 35.5 ± 3.2 | 8.2 ± 0.4  | 27.2 ± 3.00 |
|                                          | WS:OLPR 1:3  | 30.2 ± 13.8  | 0.3 ± 0.1 | 36.4 ± 1.9 | 7.1 ± 0.2  | 29.3 ± 2.0  |
| <i>C. cylindracea</i> CC4                | WS           | 60.0 ± 4.7   | 0.7 ± 0.2 | 32.0 ± 4.7 | 5.1 ± 0.7  | 26.8 ± 3.9  |
| <i>C. cylindracea</i> 4022               | WS           | 59.2 ± 1.3   | 0.8 ± 0.1 | 31.0 ± 1.8 | 2.5 ± 0.8  | 28.5 ± 2.2  |
| <i>C. cylindracea</i> 480                | WS           | 53.9 ± 5.8   | 0.8 ± 0.0 | 36.2 ± 3.7 | 5.1 ± 1.5  | 31.1 ± 3.8  |
| <i>C. cylindracea</i> 493                | WS           | 73.9 ± 9.1   | 1.0 ± 0.1 | 41.6 ± 6.9 | 8.2 ± 0.5  | 33.4 ± 6.8  |
| <i>C. cylindracea</i> 505                | WS           | 48.3 ± 3.3   | 0.6 ± 0.0 | 40.6 ± 4.5 | 3.4 ± 1.1  | 37.2 ± 3.8  |
| <i>C. cylindracea</i> 515                | WS           | 61.8 ± 4.1   | 0.8 ± 0.1 | 34.0 ± 2.7 | 6.7 ± 2.6  | 27.3 ± 3.0  |

<sup>1,2,3,4</sup> values from Koutrotsios et al. (2019), Koutrotsios et al. (2018), Koutrotsios et al. (2017) and Koutrotsios et al. (2016), respectively.

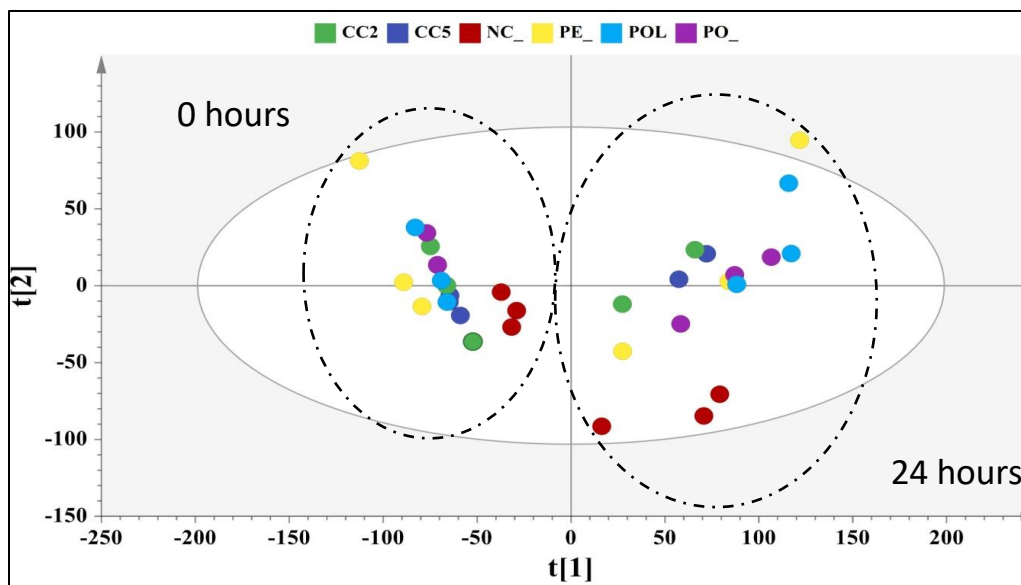

**Figure S1.** PCA analysis of the NMR data for the pre- and post-fermentation supernatants. ( $R^2X(\text{cum})=0.70$ ,  $Q^2(\text{cum})=0.60$ , Pareto scaling, Hotelling  $T^2=95\%$ ). Fecal inocula derived from 3 donors. PO; *P. ostreatus* strain 1123, POL; *P. ostreatus* strain LGM 22, PE; *P. eryngii* strain LGAM 216, CC2; *C. cylindracea* strain 2, CC5; *C. cylindracea* strain 505. NC; basal medium with no additional carbohydrate source.
